# Supplementary material
Source: bioRxiv or medRxiv preprint supplement (https://medrxiv.org/highwire/filestream/90292/field_highwire_adjunct_files/0/2020.07.19.20150144-1.pdf)
Supplement: Supplementary file [file 2020.07.19.20150144-1.pdf]

## **Supplementary Materials**

**Supplementary Figure S1** Representative results from Sanger sequencing.

**Supplementary Table S1** List of primer pairs synthesized for PCR amplification

**Supplementary Table S2** List of reference genes and variants associated with pregnancy loss and fetal anomalies from PubMed Search.

**Supplementary Table S3** Clinical indications of the 102 POC cases.

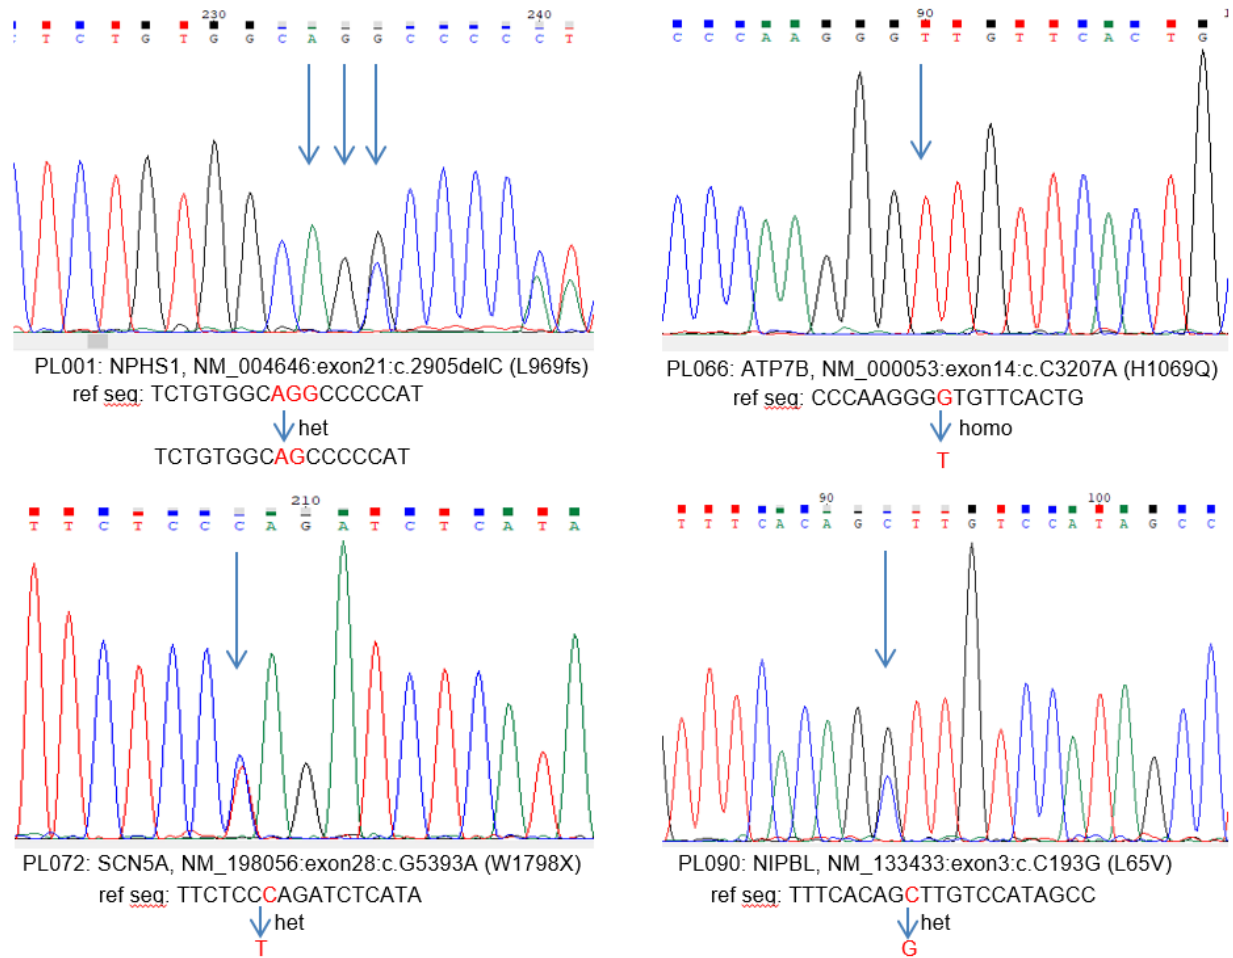

**Supplementary Figure S1** Representative results from Sanger sequencing.

A) A heterozygous frameshifting variant L969fs in the NPHS1 gene of case PL001, B) Homozygous missense variants H1069Q in the ATP7B gene of case PL066, C) A heterozygous nonsense variant W1798X in the SCN5A gene of case PL072, and D) A heterozygous missense variant L65V in the NIPBL gene of case PL090.

**Supplementary Table S1** List of primer pairs synthesized for PCR amplification

| Case ID | Variant in Exome-seq                           | Primer Name | Primer sequence (5'→3') |
|---------|------------------------------------------------|-------------|-------------------------|
| PL001   | NPHS1:NM_004646:exon21:c.2905delC:p.L969fs     | NPHS1x21F   | AGCTGGGTCCCTTTGTCTAG    |
|         |                                                | NPHS1x21R   | CCTCTGACTGCTTTCCCATC    |
| PL003   | NEFL:NM_006158:exon1:c.G493T:p.E165X           | NEFLx1F     | CTTGGTCACGTCCATCTCC     |
|         |                                                | NEFLx1R     | CAGAACAAGGTCCTGGAAGC    |
| PL006   | CHD7:NM_017780:exon26:c.C5428T:p.R1810X        | CHD7x26F    | AATCCTCCAGGCATCTTG      |
|         |                                                | CHD7x26R    | TCCTTCTTACCCGTCACCAC    |
| PL019   | FBN1:NM_000138:exon64:c.G7999A:p.E2667K        | FBN1x64F    | CAACCATGACCAGGAAGAGC    |
|         |                                                | FBN1x64R    | CCACCTCTGCCTGTCTTACC    |
| PL048   | GATA4:NM_002052:exon7:c.C1325T:p.A442V         | GATA4x7F    | CGGGATCAGGAGAAACAGAG    |
|         |                                                | GATA4x7R    | TGGAGTCATTACCAGGCAGAG   |
| PL052   | FGFR3:NM_000142:exon12:c.G1537T:p.D513Y        | FGFR3x12F   | ACCGTAGCCGTGAAGATGC     |
|         |                                                | FGFR3x12R   | GCTTGCAGGTGTCTGAAGG     |
| PL031   | DCHS1:NM_003737:exon16:c.C6421T:p.R2141X       | DCHS1x16F   | GAAGGAAGGCCACATAATGG    |
|         |                                                | DCHS1x16R   | ATGGACCCATCACCTACAGC    |
| PL038   | TSC2:NM_000548.3:c.1946+5G>T                   | TSC2F       | GGCTTTCACCATCCTCTTCC    |
|         |                                                | TSC2R       | CCTGCAGAAGCAAGAGAAGC    |
| PL024   | GFM1:NM_024996:exon7:c.913delG:p.G305fs        | GFM1x7F     | CCAGCCCTGAAGAAGAAA      |
|         |                                                | GFM1x7R     | CAGATGGATTGGGAGGT       |
| PL029   | MIB1:NM_020774:exon2:c.349dupA:p.D116fs        | MIB1x2F     | GCATGATGGAACCATGTGTG    |
|         |                                                | MIB1x2R     | GACAGCTCCATCTTCAAAGAGC  |
| PL033   | PKD1:NM_001009944:exon44:c.C12124T:p.Q4042X    | PKD1x44F    | AGTCCACACAGGAAGACACG    |
|         |                                                | PKD1x44R    | GCAAGCAGACAGATTTCTCG    |
| PL088   | NEB:NM_001271208:exon169:c.C24094T:p.R8032X    | NEBx169F    | TGGTGAGTAGGAGATCTGGA    |
|         |                                                | NEBx169R    | GATGGGTCCAGGTTGATT      |
| PL090   | CSRP3:NM_003476:exon3:c.G3A:p.M1I              | CSRP3x3F    | TGTCCACCCAACCTCACTGC    |
|         |                                                | CSRP3x3R    | GGTCTTCAGACCACTGCACTC   |
| PL090   | NIPBL:NM_133433:exon3:c.C193G:p.L65V           | NIPBLx3F    | AGCTGCCTCTTCCATCTCC     |
|         |                                                | NIPBLx3R    | TCCATAGAGCTACATGGGTCAG  |
| PL055   | PIK3R2:NM_005027:exon10:c.G1117A:p.G373R       | PIK3R2x10F  | ACAGGGATTGAGGGTCAGG     |
|         |                                                | PIK3R2x10R  | GGCTCTTGTCTGCTACTGC     |
| PL057   | SMPD1:NM_000543:exon3:c.G1133A:p.R378H         | SMPD1x3F    | GTCCTTGTCTCCATTCTAGC    |
|         |                                                | SMPD1x3R    | TTGTCTCCTCGATCCTCAGC    |
| PL059   | F11:NM_000128.3(F11):c.1716+1G>A               | F11pF       | CTCCAGAAAGCCAAGATACCC   |
|         |                                                | F11pR       | TGTGTTCCCTGCTCATTGG     |
| PL061   | SETD5:NM_001080517:exon23:c.4106dupT:p.L1369fs | SETD5x23F   | AGCCACATTCTGGAAACAGC    |
|         |                                                | SETD5x23R   | CTGGAAGGAAGCAGCTATGG    |
| PL071   | COQ2:NM_015697:exon3:c.T662C:p.L221P           | COQ2x3F     | ACATCCATGCACGCACTTAG    |
|         |                                                | COQ2x3R     | ACAGCCAATCGTCCAATAGC    |
| PL072   | SCN5A:NM_198056:exon28:c.G5393A:p.W1798X       | SCN5Ax28F   | CCTCCATCTGGATCTTCAGG    |
|         |                                                | SCN5Ax28R   | GGGCATCCTCTTCTTACC      |
| PL073   | GREB1L:NM_001142966:exon11:c.1303dupA:p.N434fs | GREB1Lx11F  | CAGGCTATGGCACTTTACCC    |
|         |                                                | GREB1Lx11R  | CCCTTTAAGGTTCTGCCTACC   |
| PL075   | SCN5A:NM_198056:exon13:c.T1933G:p.S645A        | SCN5Ax13F   | ACACAGGCATGGTGATACCC    |
|         |                                                | SCN5Ax13R   | TCCCATCAAGACCTTCATCC    |
| PL080   | JAG1:NM_000214:exon2:c.C218G:p.T73R            | JAG1x2F     | CGCCTAGTTTCAAGCCAAG     |
|         |                                                | JAG1x2R     | TCGAGTTGGAGATCCTGTCC    |
| PL083   | IDS:NM_000202:exon6:c.C778T:p.P260S            | IDSx6F      | CTGATCCAGGCAACACTGC     |
|         |                                                | IDSx6R      | CCACCACTCAAATGCATCC     |
| PL066   | ATP7B:NM_000053:exon14:c.C3207A:p.H1069Q       | ATP7Bx14F   | AGGGCAGCTAGGAGAGAAGG    |
|         |                                                | ATP7Bx14R   | TTGAACGACAGAGGATCACG    |
| PL039   | SYNGAP1:NM_006772:exon8:c.G773A:p.R258H        | SYNGAP1x8F  | CCGTCTCACCTTATGATTGC    |
|         |                                                | SYNGAP1x8R  | CTGTTGGCAGGGTTACAGG     |

**Supplementary Table S2** List of reference genes and variants associated with pregnancy loss and fetal anomalies from PubMed search

| Genes   | Variants                                                                | Germline conditions, OMIM                                                                         | Inheritance | Evidence  | References | Note                                                                         |
|---------|-------------------------------------------------------------------------|---------------------------------------------------------------------------------------------------|-------------|-----------|------------|------------------------------------------------------------------------------|
| ABCC9   | c.1320+1G>A homo                                                        | Atrial fibrillation, familial, 12, (OMIM#614050)                                                  | AD          | I         | 7          |                                                                              |
| ACTA1   | c.116G>A:p.R39H; //<br>c.44G>A:p.Gly15Asp                               | Myopathy, congenital, with fiber-type disproportion 1 (OMIM#255310)                               | AD/AR       | II, III   | 1, 11      | PMID: 30266093; 20621480; Fetal akinesia; Fetal abnormalities                |
| ACTB    | c.G617A:p.R206Q                                                         | Baraitser-Winter syndrome 1 (OMIM#243310)                                                         | AD          | I/II      | 13         |                                                                              |
| ADGRG6  | c.C2677T:p.R893X                                                        | Lethal congenital contracture syndrome 9 (OMIM#616503)                                            | AR          | II        | 1          | Affected individuals die soon after birth due to respiratory failure         |
| ALG12   | c.G437A:p.R146Q, c.930-931delAC:p.R311fs                                | Congenital disorder of glycosylation, type Ig (OMIM#607143)                                       | AR          | II        | 1          | Death in neonatal period or infancy                                          |
| ALOX15  | p.Tyr139Cys; p.Thr560Met                                                | OMIM*152392                                                                                       | N/A         | I         | 8          |                                                                              |
| AMER1   | c.705delT                                                               | Osteopathia striata with cranial sclerosis (OMIM#300373)                                          | XLD         | II        | 6          |                                                                              |
| ANK2    | c.C11716T:p.Arg3906Trp                                                  | Long QT syndrome (OMIM#600919)                                                                    | AD          | I         | 7          |                                                                              |
| ANKRD11 |                                                                         | KBG syndrome (OMIM#148050)                                                                        | AD          | II        | 5          | variants not specified in ref. 5                                             |
| AR      | c.A1814G:p.D605G                                                        | Complete androgen insensitivity syndrome (OMIM#30068)                                             | XLR         | II        | 1          |                                                                              |
| ARCN1   |                                                                         | Short stature, rhizomelic, with microcephaly, micrognathia, and developmental delay (OMIM#617164) | AD          | II        | 5          | variants not specified in ref. 5                                             |
| B3GLCT  |                                                                         | Peters-plus syndrome (OMIM#261540)                                                                | AR          | II        | 5          | variants not specified in ref. 5                                             |
| BAG3    | c.C652T:p.Arg218Trp                                                     | Myopathy, myofibrillar, 6 (OMIM#612954)                                                           | AD          | I         | 7          |                                                                              |
| BBS4    | c.1106+2T>A homo                                                        | Bardet-Biedl syndrome 4 (OMIM#615982)                                                             | AR          | II        | 6          |                                                                              |
| BBS10   | c.T1241C:p.L414S,<br>c.909_912del:p.S303fs                              | Bardet-Biedl syndrome 10 (OMIM#615987)                                                            | AR          | I/II      | 13         |                                                                              |
| BRAF    |                                                                         | Noonan syndrome 7 (OMIM#613706)                                                                   | AD          | II        | 5          | variants not specified in ref. 5                                             |
| C5ORF42 | c.C3667T:p.Q1223X                                                       | Orofaciodigital syndrome VI (OMIM#277170)                                                         | AR          | II        | 1          |                                                                              |
| CACNB2  | c.C1439T:p.Thr480Ile                                                    | Brugada syndrome 4 (OMIM#611876)                                                                  | AD          | I         | 7          |                                                                              |
| CCDC103 |                                                                         | Ciliary dyskinesia primary 17 (OMIM#14679)                                                        | AR          | II        | 5          | variants not specified in ref. 5                                             |
| CDK5    | p.N256S                                                                 | Lissencephaly 7 with cerebellar hypoplasia (OMIM#616342)                                          | AR          | II        | 6          |                                                                              |
| CDKN1C  |                                                                         | IMAGE syndrome (OMIM#614732)                                                                      | AD          | II        | 5          | variants not specified in ref. 5                                             |
| CEP290  | c.T6040C:p.Ile2134Thr, c.4195-1G                                        | Meckel syndrome 4 (OMIM#611134)                                                                   | AR          | I/II      | 13         | Lethal in utero or perinatal lethal                                          |
| CHD7    | c.C5428T:p.R1810X                                                       | CHARGE syndrome (OMIM#214800)                                                                     | AD          | II, I/II  | 5, 13      | variants not specified in ref. 5                                             |
| CHD7    | c.C5428T:p.E165X                                                        |                                                                                                   |             |           |            | This report                                                                  |
| CHRNA1  | c.C762T:p.R254C                                                         | Multiple pterygium syndrome, lethal type, 253290                                                  | AR          | I         | 10         | Lethal multiple pterygium syndrome is typically fatal in the second or third |
| CHRNA1  |                                                                         |                                                                                                   |             |           |            | Intrauterine death, variants not specified in ref. 5                         |
| CHNRG   | c.C136T:P.R46X,<br>c.459dupA:p.V154fs                                   | Escobar syndrome (OMIM#265000)                                                                    | AR          | II, II    | 1, 5       |                                                                              |
| COL11A1 | c.2739-2747del:p.P914_G916del                                           | Fibrochondrogenesis 1 (OMIM#228520)                                                               | AR          | II        | 1          |                                                                              |
| COL1A1  | c.G2110GA:p.G704S;<br>c.G2533A:p.G845R;<br>c.G2164A:p.G722S             | Osteogenesis imperfecta, type II (OMIM#166210)                                                    | AD          | II, II    | 1, 5       | Perinatal lethal, variants not specified in ref. 5                           |
| COL1A1  | c.G4024A:p.G1342S                                                       |                                                                                                   |             |           |            | This report                                                                  |
| COL1A2  | c.G1378A:p.G460S;<br>c.G2576A:p.G859D; //<br>c.G1361T:p.G454V           | Osteogenesis imperfecta, type II (OMIM#166210)                                                    | AD          | II, II    | 1, 11      |                                                                              |
| COL4A1  | c.G2879T:p.G960V                                                        | Brain small vessel disease with or without ocular anomalies (OMIM#175780)                         | AD          | II        | 1          |                                                                              |
| COQ9    |                                                                         | Coenzyme Q10 deficiency, primary, 5 (OMIM#614654)                                                 | AR          | II        | 5          | variants not specified in ref. 5                                             |
| CPT2    | c.28_2insAGCAAG:p.Try10X/homo                                           | CPT II deficiency, lethal neonatal, 608836                                                        | AR          | I/II      | 4          | lethal neonatal                                                              |
| CRB2    | p.E643A, p.N800K; p.N800K,<br>p.W759X                                   | Ventriculomegaly with cystic kidney disease (OMIM#219730)                                         | AR          | II        | 6          |                                                                              |
| CSRP3   | c.G299A, p.Arg100His                                                    | Cardiomyopathy, hypertrophic, 12 (OMIM#612124)                                                    | AD          | I         | 7          |                                                                              |
| CSRP3   | c.G3A:p.M1I                                                             |                                                                                                   |             |           |            | This report                                                                  |
| CYP11A1 | p.R120X homo                                                            | Adrenal insufficiency, congenital, with 46XY sex reversal, partial or complete (OMIM#613743)      | AR          | II        | 6          |                                                                              |
| DDX3X   | c.C1703T:p.P568L                                                        | Intellectual developmental disorder, X-linked, syndrome, Snijders Blok type (OMIM#300958)         | XLD, XLR    | II        | 1          |                                                                              |
| DES     | c.G934A:p.Asp312Asn                                                     | Myopathy, myofibrillar, 1 (OMIM#601419)                                                           | AD/AR       | I         | 7          |                                                                              |
| DNAH7   | c.G8624A:p.R2875Q,<br>c.4787_4788insA:p.Y1596X                          | OMIM*610061                                                                                       | ?           | I/II      | 13         |                                                                              |
| DNAH11  |                                                                         | Ciliary dyskinesia, primary, 7, with or without situs inversus (OMIM#611884)                      | AR          | II        | 5          | variants not specified in ref. 5                                             |
| DNAH17  | p.Q1652P                                                                | Spermatogenic failure 39 (OMIM#618643)                                                            | AR          | II        | 6          |                                                                              |
| DNAH5   | c.C6763T:p.Arg2255X,<br>c.13458dup:p.Asn4487X                           | Ciliary dyskinesia, primary, 3, with or without situs inversus (OMIM#608644)                      | AR          | I/II      | 4          |                                                                              |
| DOK7    | c.C437T:p.P146L, c.G514A:p.G172R                                        | Fetal akinesia deformation sequence 3 (OMIM#618389)                                               | AR          | II        | 1          |                                                                              |
| DSG2    | c.G2434A:p.Gly812Ser;<br>c.C3340T:p.Gln1114X                            | Arrhythmogenic right ventricular dysplasia 10 (MIM#610193)                                        | AD          | I         | 7          |                                                                              |
| DSP     | c.G4071C:p.Glu1357Asp;<br>c.C6881G:p.Ala2294Gly                         | Epidermolysis bullosa, lethal acantholytic (OMIM#609638)                                          | AR          | I         | 7          | Neonatal death                                                               |
| DSTYK   | c.C2125T:p.R709X                                                        | Congenital anomalies of kidney and urinary tract 1 (OMIM#610805)                                  | AD          | I/II      | 13         |                                                                              |
| DVL1    | c.519delT:p.W507fs                                                      | Robinow syndrome, autosomal dominant 2 (OMIM#616331)                                              | AD          | II        | 1          |                                                                              |
| DYNC2H1 | c.C10885T:p.R3629X,<br>c.C11230T:p.L3744F; p.Tyr2016Cys,<br>p.Asp2184VL | Short-rib thoracic dysplasia 3 with or without polydactyly (OMIM#613091)                          | AR, AD      | II, II, I | 1, 5, 8    | variants not specified in ref. 5                                             |
| EIF2B2  | c.C586T:p.P196S, c.G599T:p.G200V                                        | Leukoencephalopathy with vanishing white matter (OMIM#603896)                                     | AR          | II        | 1          |                                                                              |
| EP300   | c.102_105del:p.G34fs                                                    | Rubinstein-Taybi syndrome 2 (OMIM#613684)                                                         | AD          | I/II      | 13         |                                                                              |
| EPHB4   |                                                                         | Lymphatic malformation 7 (OMIM#617300)                                                            | AD          | II        | 5          | variants not specified in ref. 5                                             |
| ERCC5   | c.2766dupA:p.Leu923Thrf*7                                               | Cerebroculofacioskeletal syndrome 3 (OMIM#616570)                                                 | AR          | I/II      | 4          |                                                                              |

|         |                                                                                                                                                                |                                                                                                 |       |              |         |                                                                                                                                                |
|---------|----------------------------------------------------------------------------------------------------------------------------------------------------------------|-------------------------------------------------------------------------------------------------|-------|--------------|---------|------------------------------------------------------------------------------------------------------------------------------------------------|
| EVC2    |                                                                                                                                                                | Ellis-van Creveld syndrome (OMIM#225500)                                                        | AR    | II           | 5       | variants not specified in ref. 5                                                                                                               |
| FAM111A |                                                                                                                                                                | Gracile bone dysplasia, 602361                                                                  | AD    |              |         | Death in utero or in early infancy is                                                                                                          |
| FAM20C  | c.G956A:p.R319K,<br>c.C1529T:p.R510C                                                                                                                           | Raine syndrome (OMIM#259775)                                                                    | AR    | I/II         | 13      |                                                                                                                                                |
| FANCB   | c.987_990del                                                                                                                                                   | Fanconi anemia, complementation group B (OMIM#300514)                                           | XLR   | II           | 6       |                                                                                                                                                |
| FBN1    | c.G3299T:p.G1100V                                                                                                                                              | Marfan syndrome (OMIM#154700)                                                                   | AD    | II           | 1       |                                                                                                                                                |
| FBN1    | c.G7999A:p.E2667K                                                                                                                                              |                                                                                                 |       |              |         | This report                                                                                                                                    |
| FGFR2   | c.940-1G>A,                                                                                                                                                    | FGFR2-related disorder (OMIM#176943)                                                            | AD    | II           | 6       |                                                                                                                                                |
| FGFR2   | c.G182A:p.R61H                                                                                                                                                 |                                                                                                 |       |              |         | This report                                                                                                                                    |
| FGFR3   | c.1138G>C (p.G380R); c.742C>T<br>(p.R248C)                                                                                                                     | Achondroplasia (OMIM#100800); Thanatophoric dysplasia, type I (OMIM#187600).                    | AD    | II           | 5       | variants not specified in ref. 5                                                                                                               |
| FGFR3   | c.G1537T:p.D513Y;<br>c.C742T:p.R248C                                                                                                                           | LADD syndrome(OMIM#149730); Thanatophoric dysplasia, type I (OMIM#187600)                       |       |              |         | This report                                                                                                                                    |
| FKBP8   | c.C572T:p.P191L                                                                                                                                                | OMIM*604840                                                                                     | ?     | I/II         | 13      |                                                                                                                                                |
| FLNA    | p.V552I                                                                                                                                                        | Otopalatodigital syndrome, type I (OMIM#311300)                                                 | XLD   | II           | 6       | Otopalatodigital syndrome type II (OPD2, 304120) is an allelic disorder with a more severe, frequently lethal variants not specified in ref. 5 |
| FLNB    | // c.G4732:C:p.A1578P                                                                                                                                          | Atelosteogenesis, type I, (OMIM#108720)                                                         | AD    | II, I/II     | 5, 13   |                                                                                                                                                |
| FOXP3   | c.C1189T:p.Arg397Trp, // p.R337X                                                                                                                               | Immunodysregulation, polyendocrinopathy, and enteropathy, X-linked (OMIM#304790)                | XLR   | I/II, II     | 4, 6    |                                                                                                                                                |
| FRAS1   | c.C370T:p.R124X                                                                                                                                                | Fraser syndrome 1 (OMIM#219000)                                                                 | AR    | I/II         | 13      | Twenty-five percent of affected babies                                                                                                         |
| FRMD4A  | c.C2723T:p.S908L                                                                                                                                               | Agensis of corpus callosum with facial anomalies and cerebellar ataxia (OMIM#616819)            | AR    | II           | 1       |                                                                                                                                                |
| GATA4   |                                                                                                                                                                | Tetralogy of Fallot (OMIM#187500)                                                               | AD    | II           | 5       | variants not specified in ref. 5                                                                                                               |
| GATA4   | c.G1537T:p.A442V                                                                                                                                               |                                                                                                 |       |              |         | This report                                                                                                                                    |
| GBA     |                                                                                                                                                                | Gaucher disease, perinatal lethal (OMIM#608013)                                                 | AR    | II           | 5       | Death in utero (30%) variants not                                                                                                              |
| GBE1    | c.G1064A:p.R355H                                                                                                                                               | Glycogen storage disease type IV (OMIM#232500)                                                  | AR    | II           | 11      | PMID: 31747834                                                                                                                                 |
| GLI3    | c.C3324G:p.Y1108X                                                                                                                                              | Pallister-Hall syndrome (OMIM#146510)                                                           | AD    | II           | 1       |                                                                                                                                                |
| GPD1L   | c.A370G:p.Ile124Val (x4)                                                                                                                                       | Brugada syndrome 2 (OMIM#611777)                                                                | AD    | I            | 7       |                                                                                                                                                |
| GPD1L   | c.A372G:p.I124M                                                                                                                                                |                                                                                                 |       |              |         | This report                                                                                                                                    |
| GREB1L  | c.C2903T:p.A968V; c.C293F:p.S98X                                                                                                                               | Renal hypodysplasia/aplasia 3 (OMIM#617805)                                                     | AD    | I/II         | 13      | Death in utero or in the perinatal period may occur                                                                                            |
| GREB1L  | c.1303dupA:p.N434fs                                                                                                                                            |                                                                                                 |       |              |         | This report                                                                                                                                    |
| HCCS    | c.308_309insAGT, p.V103dup                                                                                                                                     | Linear skin defects with multiple congenital anomalies 1 (OMIM#309801)                          | XLD   | II           | 1       |                                                                                                                                                |
| HRAS    | p.G13D                                                                                                                                                         | Costello syndrome (OMIM#218040)                                                                 | AD    | II           | 6       |                                                                                                                                                |
| IFT80   | c.G721C:p.G241R                                                                                                                                                | Short-rib thoracic dysplasia 2 with or without polydactyly (OMIM#611263)                        | AR    | II           | 1       |                                                                                                                                                |
| INTU    | c.1259+5G>T, c.C1714T:p.R572X                                                                                                                                  | Ciliopathy with short-rib thoracic dysplasia & polydactyly (OMIM#617925)                        | AR    | II           | 1       |                                                                                                                                                |
| KCNE1   | p.Asp85Asn                                                                                                                                                     | Long QT syndrome 5 (OMIM#613695)                                                                | AD    | I            | 9       | double hits KCNE1/KCNE2 in one case                                                                                                            |
| KCNE2   | p.Thr8Ala                                                                                                                                                      | Long QT syndrome 5 (OMIM#613695)                                                                | AD    | I            | 9       | double hits KCNE1/KCNE2 in one case                                                                                                            |
| KCNH2   | c.C737T:p.R25W;<br>c.C2674T:p.Arg892Cys                                                                                                                        | Long QT syndrome 2 (OMIM#613688)                                                                | AD    | I, I         | 3, 7    |                                                                                                                                                |
| KCNJ2   | p.Arg40Gln                                                                                                                                                     | Artrial fibrillation, familial 9 (OMIM#613980)                                                  | AD    | I            | 9       |                                                                                                                                                |
| KCNJ8   | c.C1265T:p.ser422Leu                                                                                                                                           | VUS in OMIM*300935                                                                              | ?     | I            | 7       |                                                                                                                                                |
| KCNQ1   | c.G847A:p.A283T;<br>c.C1189T:p.R397W;<br>c.G1178T:p.K393N; //<br>c.G328A:p.Val110Ile;<br>c.A820G:p.Ile274Val;<br>c.C1189T:p.Arg397Trp;<br>c.G1378A:p.Gly460See | Long QT syndrome 1 (OMIM#192500)                                                                | AD    | I, I         | 3, 7    |                                                                                                                                                |
| KMT2D   | c.6617dupC:p.A2207fs;<br>c.1967delT:p.L656fs;<br>c.15680_15693dup:p.1523fs;<br>c.C5707T:p.R1903X; //<br>c.C3249A:p.Cys1083X;<br>c.G1434T:p.Glu4781X            | Kabuki syndrome 1 (OMIM#147920)                                                                 | AD    | II, I/II, II | 1, 4, 5 | First four by ref 1 // fifth & six by ref 4; variants not specified in ref. 5                                                                  |
| KRAS    | c.C149T:p.T50I                                                                                                                                                 | Noonan syndrome 3 (OMIM#609942)                                                                 | AD    | II           | 1       |                                                                                                                                                |
| L1CAM   | c.2987delG                                                                                                                                                     | L1CAM-related disorders (OMIM#308840)                                                           | XLR   | II           | 6       |                                                                                                                                                |
| LAMA3   |                                                                                                                                                                | Epidermolysis bullosa, junctional, Herlitz type, 226700                                         | AR    |              |         | Often lethal in infancy                                                                                                                        |
| LAMB3   |                                                                                                                                                                | Epidermolysis bullosa, junctional, Herlitz type, 226700                                         | AR    |              |         | Often lethal in infancy                                                                                                                        |
| LAMC2   |                                                                                                                                                                | Epidermolysis bullosa, junctional, Herlitz type, 226700                                         | AR    |              |         | Often lethal in infancy                                                                                                                        |
| LAMC3   | c.G4415A:p.R1472Q, c.4477+1G>A                                                                                                                                 | Cortical malformations, occipital (OMIM#614115)                                                 | AR    | II           | 1       |                                                                                                                                                |
| MID1    | c.673_674delAG:p.S525X                                                                                                                                         | Opitz GBBB syndrome, type I (OMIM#300000)                                                       | XLR   | II, II       | 1, 5    | variants not specified in ref. 5                                                                                                               |
| MNX1    | c.T2C:p.M1T homo                                                                                                                                               | Currarino syndrome (OMIM#176450)                                                                | AD    | I/II         | 13      |                                                                                                                                                |
| MRPS22  | c.768_769del:p.R170H                                                                                                                                           | Combined oxidative phosphorylation deficiency 5 (OMIM#611719)                                   | AR    | II           | 6       |                                                                                                                                                |
| MYBPC3  | c.G2497A:p.Ala833Thr;<br>c.G2348A:p.Arg783His                                                                                                                  | Cardiomyopathy, hypertrophic, 4 (OMIM#115197)                                                   | AD/AR | I            | 7       |                                                                                                                                                |
| MYCN    |                                                                                                                                                                | Feingold syndrome 1 (OMIM#164380)                                                               | AD    | II           | 5       | variants not specified in ref. 5                                                                                                               |
| MYH3    | c.G2015A:p.R672H                                                                                                                                               | Contractures, pterygia, and spondylocarpopostarsal fusion syndrome 1A (OMIM#178110)             | AD    | II           | 1       |                                                                                                                                                |
| MYH7    | c.G2348A:p.Gly202Arg                                                                                                                                           | MYH7-related disorders (OMIM#160760)                                                            | AD    | I            | 7       |                                                                                                                                                |
| NALCN   |                                                                                                                                                                | Congenital contractures of the limbs and face, hypotonia, and developmental delay (OMIM#616266) | AD    | II           | 5       | variants not specified in ref. 5                                                                                                               |
| NDUFA5  | c.T29A:p.L10X, c.T782G:p.M261R                                                                                                                                 | Mitochondrial complex I deficiency, nuclear type 16 (OMIM#618238)                               | AR    | II           | 1       |                                                                                                                                                |
| NEBL    | c.G604A:p.Gly202Arg                                                                                                                                            | OMIM*605491                                                                                     | ?     | I            | 7       |                                                                                                                                                |
| NEK8    |                                                                                                                                                                | Renal-hepatic-pancreatic dysplasia 2, 615415                                                    | AR    |              |         | Death in utero or early childhood                                                                                                              |

|        |                                                                                                                                                                                                                                   |                                                                                  |     |                  |             |                                                                                                                     |
|--------|-----------------------------------------------------------------------------------------------------------------------------------------------------------------------------------------------------------------------------------|----------------------------------------------------------------------------------|-----|------------------|-------------|---------------------------------------------------------------------------------------------------------------------|
| NEK9   | c.C1489T;p.Arg497X                                                                                                                                                                                                                | Lethal congenital contracture syndrome 10 (OMIM#617022)                          | AR  | I                | 9           | 3 cases: 1 died 1-hr after birth, resuscitation failed in 2, 1 died in utero,                                       |
| NEXN   | c.A995C;p.Glu332Ala                                                                                                                                                                                                               | Cardiomyopathy, dilated, 1CC (OMIM#613122)                                       | AD  | I                | 7           |                                                                                                                     |
| NIPBL  | c.459-2A>G                                                                                                                                                                                                                        | Cornelia de Lange syndrome 1 (OMIM#122470)                                       | AD  | II, II           | 1, 5        | variants not specified in ref. 5                                                                                    |
| NIPBL  | c.C193G;p.L65V; c.A1927G;p.K643E                                                                                                                                                                                                  |                                                                                  |     |                  |             | This report                                                                                                         |
| NPHS1  | c.C3478T;p.R1160X                                                                                                                                                                                                                 | Nephrotic syndrome type 1 (OMIM#256300)                                          | AR  | III              | 12          |                                                                                                                     |
| NPHS1  | c.2905delC;p.L969fs, c.3110-5C>T                                                                                                                                                                                                  |                                                                                  |     |                  |             | This report                                                                                                         |
| NR2F2  |                                                                                                                                                                                                                                   | Congenital heart defects, multiple types, 4 (OMIM#615779)                        | AD  | II               | 5           | variants not specified in ref. 5                                                                                    |
| NRAS   |                                                                                                                                                                                                                                   | Noonan syndrome 6 (OMIM#613224)                                                  | AD  | II               | 5           | variants not specified in ref. 5                                                                                    |
| NUP188 | p.R202H                                                                                                                                                                                                                           | Sandestig-Stefanova syndrome (OMIM#618804)                                       | AR  | II               | 6           |                                                                                                                     |
| OFD1   | c.T929C;p.F310S                                                                                                                                                                                                                   | Orofaciodigital syndrome I (OMIM#311200)                                         | XLD | II               | 11          | Lethal in males                                                                                                     |
| OTC    |                                                                                                                                                                                                                                   | Ornithine transcarbamylase deficiency, 311250                                    | XLR |                  |             | Two types - lethal neonatal and less                                                                                |
| P3H1   | c.12delC;p.1700fs                                                                                                                                                                                                                 | Osteogenesis imperfecta, type VIII (OMIM#610915)                                 | AR  | II               | 1           |                                                                                                                     |
| PADI6  |                                                                                                                                                                                                                                   | Preimplantation embryonic lethality 2, 617234                                    | AR  |                  |             | early embryonic arrest.                                                                                             |
| PDHA1  | c.1134duoG;p.V378fs                                                                                                                                                                                                               | Pyruvate dehydrogenase E1-alpha deficiency (OMIM#312170)                         | XLD | I/II             | 13          |                                                                                                                     |
| PEX1   | c.2097dupT;p.1700fs, c.C3205T;p.Q1069X; // c.C3205T;p.Q1069X, c.2097 2098insT;p.1700fs                                                                                                                                            | Peroxisome biogenesis disorder 1A (Zellweger) (OMIM#214100)                      | AR  | II, I/II         | 1, 13       |                                                                                                                     |
| PIEZO1 | c.G3206A;p.Trp1069X, c.A6208C;p.Lys2070Gln; // p.E679X                                                                                                                                                                            | Nonimmune hydrops fetalis (NIHF) by generalized lymphatic dysplasias (GLD)       | AR  | I, II, II        | 2, 5, 6     | Seven other case reported in Fotiou et al, 2015 and Lukacs et al. 2015, see ref 2; variants not specified in ref. 5 |
| PIGN   | c.548_549+delAGGTTTGT;p.?AR, c.T654G;p.His218Gln                                                                                                                                                                                  | Multiple congenital anomalies-hypotonia-seizures syndrome 1 (OMIM#614080)        | AR  | I/II             | 4           |                                                                                                                     |
| PIK2R2 | c.G1117A;p.Gly373Arg                                                                                                                                                                                                              | Magalencephaly-polymicrogyria-polydactyly-hydrocephalus syndrome (MPPH)          | AD  | I/II             | 4           |                                                                                                                     |
| PIK3CA | p.E545K                                                                                                                                                                                                                           | Cowden syndrome 5 (OMIM#615108)                                                  | AD  | II, II           | 5, 6        | variants not specified in ref. 5                                                                                    |
| PIK3R2 | p.G373R; p.K564E                                                                                                                                                                                                                  | Megalencephaly-polymicrogyria-polydactyly-hydrocephalus syndrome 1 (OMIM#603387) | AD  | II               | 4, 6        |                                                                                                                     |
| PIK3R2 | c.G1117A;p.G373R                                                                                                                                                                                                                  |                                                                                  |     |                  |             | This report                                                                                                         |
| PIPK4  |                                                                                                                                                                                                                                   | Popliteal pterygium syndrome, Bartsocas-Papas type, 263650                       | AR  | II               | 6           |                                                                                                                     |
| PKD1L1 | c.6473+2_6473+3del                                                                                                                                                                                                                | Heterotaxy, visceral, 8, autosomal (OMIM#6172905)                                | AR  | II               | 1           |                                                                                                                     |
| PKHD1  |                                                                                                                                                                                                                                   | Polycystic kidney disease 4, with or without hepatic disease, 263200             | AR  |                  |             | Manifests in infancy (including neonatal lethal) or childhood                                                       |
| PKP2   | c.C2431A;p.Arg811Ser                                                                                                                                                                                                              | Arrhythmogenic right ventricular dysplasia 9 (OMIM#609040)                       | AD  | I                | 7           |                                                                                                                     |
| PTPN11 | c.A227T;p.E76V; c.T854C;p.F285S;                                                                                                                                                                                                  | Noonan syndrome 1 (OMIM#163950)                                                  | AD  | II, II, II       | 1, 5, 6     | variants not specified in ref. 5                                                                                    |
| RAB23  |                                                                                                                                                                                                                                   | Carpenter syndrome (OMIM#201000)                                                 | AR  | II               | 5           | variants not specified in ref. 5                                                                                    |
| RAPSN  | c.1166+1G>C; // c.A485G;p.Glu162Gly; //c.G484A;p.E162K                                                                                                                                                                            | Fetal akinesia deformation sequence 2 (OMIM#618388)                              | AR  | II, I/II, II, II | 1, 4, 5, 11 | variants not specified in ref. 5                                                                                    |
| RIPK4  | p.A10S, p.V303M                                                                                                                                                                                                                   | Popliteal pterygium syndrome, Bartsocas-Papas type (OMIM#263650)                 | AR  | II               | 6           |                                                                                                                     |
| RIT1   | c.T246G;p.F82L; // c.A268G;p.Met90val; // p.F82C                                                                                                                                                                                  | Noonan syndrome 8 (OMIM#615355)                                                  | AD  | II, I/II, II, II | 1, 4, 5, 6  | variants not specified in ref. 5                                                                                    |
| RYR1   | c.G14344A;p.G4782R, c.14512-1G>A                                                                                                                                                                                                  | Minicore myopathy with external ophthalmoplegia (OMIM#255320)                    | AR  | II, II           | 1, 5        | Some patients have lethal fetal akinesia with death in utero, variants not                                          |
| RYR2   | c.G11497A;p.Asp3833Asn; c.C4747T;p.Pro1583Ser; c.G6337A;p.Val2113Met                                                                                                                                                              | Arrhythmogenic right ventricular dysplasia 2 (OMIM#600996)                       | AD  | I                | 7           |                                                                                                                     |
| SCN5A  | c.C659T;p.K393N; c.C1571T;p.T220I; c.C1571A;p.S524Y; c.G2314A;p.D772N; c.G3347A;p.R1116Q; c.G3578A;p.R1193Q; c.C6016G;p.P2006A; // p.Gly615Glu; p.Arg481Trp; // c.G1663G>T;p.Glu555X; c.C1858T;p.Arg620Cys; c.G5350A;p.Glu1784Lys | Brugada syndrome 1 (OMIM#601144); SCN5A-related disorders (OMIM#600163)          | AD  | I, I, I          | 3, 9, 7     |                                                                                                                     |
| SCN5A  | c.G5393A;p.W1798X; c.T1933G;p.S645A                                                                                                                                                                                               |                                                                                  |     |                  |             | This report                                                                                                         |
| SF3B4  |                                                                                                                                                                                                                                   | Acrofacial dysostosis 1, Nager type (OMIM#154400)                                | AD  | II               | 5           | variants not specified in ref. 5                                                                                    |
| SOS1   | c.G1655A;p.R522K                                                                                                                                                                                                                  | Noonan syndrome 4 (OMIM#610733)                                                  | AD  | II, II           | 1, 5        | variants not specified in ref. 5                                                                                    |
| SOS1   | c.G205A;p.D69N                                                                                                                                                                                                                    |                                                                                  |     |                  |             | This report                                                                                                         |
| SOX9   | c.738delG                                                                                                                                                                                                                         | Campomelic dysplasia (OMIM#114290)                                               | AD  | II, II           | 5, 6        | variants not specified in ref. 5                                                                                    |
| TAB2   |                                                                                                                                                                                                                                   | Congenital heart defects, nonsyndromic, 2 (OMIM#614980)                          | AD  | II               | 5           | variants not specified in ref. 5                                                                                    |
| TCTN1  | c.342-2A>C, c.C898T;p.R300X                                                                                                                                                                                                       | Joubert syndrome 13 (OMIM#614173)                                                | AR  | I/II             | 13          |                                                                                                                     |
| TCTN2  |                                                                                                                                                                                                                                   | Meckel syndrome 8 (OMIM#613885)                                                  | AR  | II               | 5           | variants not specified in ref. 5                                                                                    |
| TFAP2A |                                                                                                                                                                                                                                   | Branchiooculofacial syndrome (OMIM#113620)                                       | AD  | II               | 5           | variants not specified in ref. 5                                                                                    |
| TGFB1  | c.605_606insGAGAACTTGT;p.A202delinsARTIV                                                                                                                                                                                          | Loeys-Dietz syndrome 1 (OMIM#609192)                                             | AD  | I/II             | 13          |                                                                                                                     |
| TMEM67 | c.G1319A;p.R440Q, c.G233A;p.C78Y; // c.149_151del;p.N52del, c.G1674A;p.Q558Q; c.G233A;p.C78Y, c.1717delA;p.N573fs                                                                                                                 | Meckel syndrome 3 (OMIM#607361)                                                  | AR  | II, I/II         | 1, 13       | Lethal in utero or in the perinatal period                                                                          |

|        |                                                                                   |                                                                             |       |          |       |                                  |
|--------|-----------------------------------------------------------------------------------|-----------------------------------------------------------------------------|-------|----------|-------|----------------------------------|
| TNNI3  | c.C292T:p.Arg98X                                                                  | TNNI3-related disorders (OMIM#191044)                                       | AD/AR | I        | 7     |                                  |
| TRPM4  | c.1195_1202del, p.Leu399Glyfs*11;<br>c.A2740T:p.Lys914X;<br>c.T3224C:p.Leu1075Pro | Progressive familial heart block, type IB (OMIM#604559)                     | AD    | I        | 7     |                                  |
| TSC2   | de novo 41kb del, including PKD1                                                  | Tuberous sclerosis-2(OMIM#613254)                                           | AD    | II       | 5     |                                  |
| TTN    | c.25639+1G>T                                                                      | OMIM*617474                                                                 | ?     | I        | 7     |                                  |
| TUBA1A | c.G1118G:A:p.R373K; //<br>c.G55A:p.A19T                                           | Lissencephaly 3 (OMIM#6116003)                                              | AD    | II, I/II | 1, 13 |                                  |
| TUBB   | // c.C920T:p.P307L                                                                | Cortical dysplasia, complex, with other brain malformations 6 (OMIM#615771) | AD    | II, I/II | 5, 13 | variants not specified in ref. 5 |
| TUBB3  | c.G862A:p.E288K; //<br>c.C533T:p.T178M                                            | Cortical dysplasia, complex, with other brain malformations 1 (OMIM#614039) | AD    | I/II     | 13    |                                  |
| VEGFA  | c.C789A:p.C263X                                                                   | Microvascular complications of diabetes 1 (OMIM#603933)                     | NA    | I/II     | 13    |                                  |
| WDR19  | c.T275G:p.L92X, c.G880A:p.G294R;                                                  | Short-rib thoracic dysplasia 5 with or without polydactyly (OMIM#614376)    | AR    | II       | 1     |                                  |
| WNT3   | p.R326Q                                                                           | Tetra-amelia syndrome 1 (OMIM#273395)                                       | AR    | II       | 6     |                                  |
| ZC4H2  |                                                                                   | Wieacker-Wolff syndrome (OMIM#314580)                                       | XLR   | II       | 5     | variants not specified in ref. 5 |

| References | Evidence Level* | Titles                                                                                                                                                                                                                                                                                                                                                       | PMID           | DOI                                                   |
|------------|-----------------|--------------------------------------------------------------------------------------------------------------------------------------------------------------------------------------------------------------------------------------------------------------------------------------------------------------------------------------------------------------|----------------|-------------------------------------------------------|
| 1          | II              | Normand EA, et al., Clinical exome sequencing for fetuses with ultrasound abnormalities and a suspected Mendelian disorder. <i>Genome Med.</i> 2018; 28;10(1):74.                                                                                                                                                                                            | PMID: 30266093 | doi: 10.1186/s13073-018-0582-x.                       |
| 2          | I               | Datkhaeva I, et al., Identification of novel PIEZO1 variants using prenatal exome sequencing and correlation to ultrasound and autopsy findings of recurrent hydrops fetalis. <i>Am J Med Genet A.</i> 2018;176(12):2829-2834.                                                                                                                               | PMID: 30244526 | doi: 10.1002/ajmg.a.40533.                            |
| 3          | I               | Crotti L, et al., Long QT syndrome-associated mutations in intrauterine fetal death. <i>JAMA.</i> 2013;309(14):1473-82.                                                                                                                                                                                                                                      | PMID: 23571586 | doi: 10.1001/jama.2013.3219.                          |
| 4          | I/II            | Quinlan-Jones E, et al., Molecular autopsy by trio exome sequencing (ES) and postmortem examination in fetuses and neonates with prenatally identified structural anomalies. <i>Genet Lord J, et al., Prenatal exome sequencing analysis in fetal structural anomalies detected by ultrasonography (PAGE): ahort study. Lancet.</i> 2019;393(10173):747-757. | PMID: 30293990 | doi: 10.1038/s41436-018-01016-5/0140-6736(18)31940-8. |
| 5          | II              | Yates CL, et al., Whole-exome sequencing on deceased fetuses with ultrasound anomalies: expanding our knowledge of genetic disease during fetal development. <i>Genet Med.</i> 2017;19(10):1171-1178.                                                                                                                                                        | PMID: 30712880 | doi: 10.1038/gim.2017.31.                             |
| 6          | II              | Sahlin E, et al., Identification of putative pathogenic single nucleotide variants (SNVs) in genes associated with heart disease in 290 cases of stillbirth. <i>PLoS One.</i> 2019;14(1):e0210017.                                                                                                                                                           | PMID: 28425981 | doi: 10.1371/journal.pone.0210017.                    |
| 7          | I               | Qiao et al., Whole exome sequencing in recurrent early pregnancy loss. <i>Mol Hum Reprod.</i> 2016;22(5):364-72.                                                                                                                                                                                                                                             | PMID: 30615648 | doi:10.1093/molehr/gaw008                             |
| 8          | I               | Munroe PB, Addison S, Abrams DJ, et al. Postmortem Genetic Testing for Cardiac Ion Channelopathies in Stillbirths. <i>Circ Genom Precis Med.</i> 2018;11(1):e001817.                                                                                                                                                                                         | PMID: 30712880 | doi:10.1161/CIRCGEN.117.001817                        |
| 9          | I               | Shamseldin HE, Swaid A, Alkuraya FS. Lifting the lid on unborn lethal Mendelian phenotypes through exome sequencing. <i>Genet Med.</i> 2013;15(4):307-309.                                                                                                                                                                                                   | PMID: 22564503 | doi:10.1038/gim.2012.130                              |
| 10         | II              | Alamillo CL, Powis Z, Farwell K, et al. Exome sequencing positively identified relevant alterations in more than half of cases with an indication of prenatal ultrasound anomalies. <i>Prenat Diagn.</i> 2015;35(11):1073-1078.                                                                                                                              | PMID: 29261186 | doi:10.1002/pd.4648                                   |
| 11         | III             | Ovunc B, Ashraf S, Vega-Warner V, et al. Mutation analysis of NPHS1 in a worldwide cohort of congenital nephrotic syndrome patients. <i>Nephron Clin Pract.</i> 2012;120(3):c139-c146.                                                                                                                                                                       | PMID: 22564503 | doi:10.1159/000337379                                 |
| 12         | I/II            | Boissel S, Fallet-Bianco C, Chitayat D, et al. Genomic study of severe fetal anomalies and discovery of GREB1L mutations in renal agenesis. <i>Genet Med.</i> 2018;20(7):745-753.                                                                                                                                                                            | PMID: 29261186 | doi:10.1038/gim.2017.173                              |

\* Evidence level I based on the studies of spontaneous abortion and stillbirth, evidence level II based on the studies of mixture of fetal death and fetal anomaly, evidence level III based on the studies of perinatal infant.

Supplementary Table S3 Clinical indications of the 102 POC cases\*

| Case ID | Specimen | Gender | Pregnancy loss | Clinical indications                  | Maternal age range (yrs) | Gestational age (wks+d) |
|---------|----------|--------|----------------|---------------------------------------|--------------------------|-------------------------|
| PL001   | skin     | M      | stillbirth     | IUFD                                  | 36-40                    | 21+5                    |
| PL002   | skin     | F      | stillbirth     | Fetal demise of twin B                | 31-35                    | 34+0                    |
| PL003   | skin     | M      | stillbirth     | Fetal anomaly                         | 31-35                    | 22+2                    |
| PL004   | skin     | M      | stillbirth     | Fetal congenital diaphragmatic hernia | 31-35                    | 23+0                    |
| PL005   | skin     | M      | SAB            | Fetal demise                          | 31-35                    | 13+0                    |
| PL006   | villi    | M      | SAB            | Fetal anomaly of cystic hygroma       | 26-30                    | 11+0                    |
| PL007   | skin     | F      | stillbirth     | IUFD                                  | 31-35                    | 35+5                    |
| PL008   | villi    | F      | SAB            | Missed abortion                       | 26-30                    | 7+0                     |
| PL009   | villi    | F      | SAB            | SAB                                   | 36-40                    | 8+0                     |
| PL010   | skin     | F      | stillbirth     | IUFD                                  | 31-35                    | 27+5                    |
| PL011   | skin     | M      | stillbirth     | Fetal multiple CNS anomalies          | 26-30                    | 22+3                    |
| PL012   | tissue   | F      | SAB            | PPROM                                 | 21-25                    | 15+2                    |
| PL013   | skin     | F      | stillbirth     | Fetal demise                          | 21-25                    | 22+0                    |
| PL014   | tissue   | M      | SAB            | Fetal anomaly                         | 21-25                    | 12+0                    |
| PL015   | skin     | F      | stillbirth     | IUFD                                  | >=41                     | 22+0                    |
| PL016   | skin     | M      | stillbirth     | Fetal demise                          | 26-30                    | 21+5                    |
| PL017   | skin     | F      | stillbirth     | Multiple fetal abn                    | 31-35                    | 22+3                    |
| PL018   | skin     | F      | SAB            | Fetal demise                          | 31-35                    | 20+0                    |
| PL019   | skin     | F      | stillbirth     | Fetal demise, mutiple anomalies       | 26-30                    | 22+4                    |
| PL020   | tissue   | M      | SAB            | Missed abortion                       | 21-25                    | 14+0                    |
| PL021   | skin     | M      | SAB            | Fetal anomaly                         | 26-30                    | 19+5                    |
| PL022   | villi    | F      | SAB            | Missed abortion                       | 36-40                    | 9+0                     |
| PL023   | skin     | M      | unknown        | Fetal demise                          | 26-30                    | unknown                 |
| PL024   | tissue   | M      | stillbirth     | Fetal anomaly,Twin A                  | 21-25                    | 20+5                    |
| PL025   | skin     | F      | stillbirth     | Fetal anomaly                         | 26-30                    | 21+3                    |
| PL026   | skin     | M      | stillbirth     | PPROM                                 | 31-35                    | 20+6                    |
| PL027   | tissue   | F      | unknown        | Fetal demise                          | 31-35                    | unknown                 |
| PL028   | skin     | F      | stillbirth     | Anhydramnios                          | 21-25                    | 21+1                    |
| PL029   | skin     | M      | SAB            | Embryonic demise                      | 36-40                    | 10+0                    |
| PL030   | cord     | F      | SAB            | SABx4                                 | 31-35                    | 14+5                    |
| PL031   | skin     | M      | unknown        | Fetal demise                          | 31-35                    | unknown                 |
| PL032   | skin     | M      | stillbirth     | IUFD                                  | 26-30                    | 22+0                    |
| PL033   | skin     | F      | unknown        | SAB                                   | 31-35                    | unknown                 |
| PL034   | skin     | F      | SAB            | Missed abortion                       | 36-40                    | 18+0                    |
| PL035   | skin     | F      | stillbirth     | Fetal anomaly                         | 31-35                    | 22+5                    |
| PL036   | skin     | F      | SAB            | IUFD                                  | 21-25                    | 16+0                    |
| PL037   | tissue   | F      | unknown        | Fetal demise                          | unknown                  | unknown                 |
| PL038   | skin     | F      | stillbirth     | Missed abortion, fetal anomalies      | 26-30                    | 23+6                    |
| PL039   | skin     | M      | stillbirth     | Fetal demise                          | 31-35                    | 21+2                    |
| PL040   | skin     | M      | unknown        | Fetal demise                          | 31-35                    | unknown                 |
| PL041   | skin     | M      | SAB            | Fetal demise                          | 26-30                    | 19+4                    |
| PL042   | skin     | F      | SAB            | Missed abortion                       | >=41                     | 18+6                    |
| PL043   | villi    | M      | SAB            | Missed abortion, r/o molar pregnancy  | 26-30                    | 8+3                     |
| PL044   | skin     | M      | stillbirth     | IUFD                                  | 36-40                    | 20+2                    |
| PL045   | villi    | F      | SAB            | Missed abortion                       | >=41                     | 6+0                     |
| PL046   | villi    | F      | stillbirth     | Abn placenta                          | 31-35                    | 29+4                    |
| PL047   | skin     | M      | SAB            | Missed abortion                       | >=41                     | 15+6                    |
| PL048   | skin     | F      | SAB            | Fetal demise                          | 31-35                    | 15+0                    |



|       |        |   |            |                                        |       |         |
|-------|--------|---|------------|----------------------------------------|-------|---------|
| PL049 | skin   | F | SAB        | Fetal demise                           | 21-25 | 19+0    |
| PL050 | skin   | M | stillbirth | Fetal anomalies and IUGR with 3w lag   | 36-40 | 23+1    |
| PL051 | villi  | F | SAB        | Missed abortion                        | 36-40 | 12+0    |
| PL052 | villi  | M | SAB        | Missed abortion                        | 36-40 | 10+4    |
| PL053 | villi  | F | stillbirth | fetal anomaly                          | 21-25 | 21+2    |
| PL054 | villi  | M | SAB        | Fetal demise                           | 26-30 | 9+4     |
| PL055 | skin   | M | stillbirth | Fetal anomaly                          | 36-40 | 22+4    |
| PL056 | skin   | F | stillbirth | IUFD                                   | 26-30 | 36+4    |
| PL057 | skin   | M | SAB        | Fetal anomaly                          | <=20  | 13+3    |
| PL058 | skin   | M | SAB        | Fetal anomaly                          | 31-35 | 19+4    |
| PL059 | skin   | F | stillbirth | Fetal demise                           | 36-40 | 26+0    |
| PL060 | skin   | F | SAB        | Spina bifida                           | 36-40 | 19+0    |
| PL061 | skin   | M | stillbirth | Fetal demise                           | 31-35 | 32+0    |
| PL062 | skin   | F | unknown    | Fetal anomaly                          | 36-40 | unknown |
| PL063 | tissue | F | SAB        | Fetal demise                           | 36-40 | 12+0    |
| PL064 | skin   | M | SAB        | PPROM                                  | 26-30 | 20+0    |
| PL065 | villi  | M | stillbirth | Fetal anomalies                        | >=41  | 21+0    |
| PL066 | skin   | F | stillbirth | Fetal demise                           | 31-35 | 26+0    |
| PL067 | skin   | M | SAB        | Skeletal dysplasia                     | 36-40 | 20+0    |
| PL068 | skin   | F | SAB        | Fetal anomaly                          | 21-25 | 12+0    |
| PL069 | skin   | M | SAB        | Fetal anomaly                          | 36-40 | 19+4    |
| PL070 | skin   | F | SAB        | PPROM and IUFD                         | 21-25 | 16+4    |
| PL071 | skin   | F | stillbirth | Fetal anomaly                          | 31-35 | 21+0    |
| PL072 | skin   | F | stillbirth | Fetal demise                           | 26-30 | 22+0    |
| PL073 | skin   | F | SAB        | fetal anomaly                          | 31-35 | 18+6    |
| PL074 | villi  | M | SAB        | Unrxplan, pregn loss                   | 31-35 | 16+0    |
| PL075 | skin   | M | stillbirth | PPROM                                  | 31-35 | 20+5    |
| PL076 | villi  | F | SAB        | SAB                                    | 26-30 | 7+0     |
| PL077 | skin   | F | stillbirth | Fetal anomaly                          | 26-30 | 22+7    |
| PL078 | skin   | M | SAB        | Fetal demise                           | 21-25 | 16+0    |
| PL079 | skin   | F | SAB        | Fetal demise                           | 36-40 | 17+0    |
| PL080 | skin   | M | unknown    | Fetal demise                           | 21-25 | unknown |
| PL081 | villi  | M | unknown    | Fetal demise                           | 31-35 | unknown |
| PL082 | skin   | M | stillbirth | IUFD                                   | 21-25 | 28+5    |
| PL083 | villi  | M | SAB        | Fetal demise                           | 31-35 | 14+3    |
| PL084 | skin   | F | stillbirth | Fetal demise                           | 21-25 | 24+5    |
| PL085 | skin   | M | stillbirth | Fetal demise                           | 36-40 | 23+4    |
| PL086 | skin   | F | SAB        | Missed abortion                        | 36-40 | 11+4    |
| PL087 | villi  | M | SAB        | Miscarriage                            | 21-25 | 7+5     |
| PL088 | villi  | F | SAB        | Fetal anomalies                        | 36-40 | 18+0    |
| PL089 | skin   | F | stillbirth | Fetal anomaly                          | 36-40 | 21+4    |
| PL090 | tissue | F | SAB        | Fetal demise                           | 36-40 | 11+3    |
| PL091 | tissue | F | SAB        | Multiple fetal deformities             | 31-35 | 19+6    |
| PL092 | villi  | F | SAB        | Missed abortion                        | 31-35 | 8+0     |
| PL093 | villi  | M | SAB        | Missed abortion                        | 31-35 | 10+0    |
| PL094 | tissue | M | SAB        | Fetal demise                           | 31-35 | 15+1    |
| PL095 | skin   | M | unknown    | Fetal anomaly                          | 36-40 | unknown |
| PL096 | skin   | F | stillbirth | Severe oligohydramnios                 | 21-25 | 20+4    |
| PL097 | skin   | M | SAB        | Fetal demise                           | 36-40 | 17+0    |
| PL098 | tissue | M | stillbirth | Multiple fetal cardiac anomalies       | 21-25 | 22+2    |
| PL099 | skin   | F | stillbirth | Previale PPROM, possible renal anomaly | 36-40 | 23+3    |
| PL100 | skin   | M | stillbirth | Fetal anomaly                          | 31-35 | 22+3    |
| PL101 | villi  | F | SAB        | Fetal demise                           | 26-30 | 14+5    |
| PL102 | villi  | M | SAB        | Anencephaly of fetus                   | >=41  | 12+0    |
